# Supplementary material for: A Flexible micro-supercapacitor based on a pen ink-carbon fiber thread
Source: Royal Society of Chemistry journal article supplement (doi:10.1039/c4ta03442b), 2014-01-01
Supplement: c4ta03442b1.pdf [file c4ta03442b1.pdf]

## Supporting Information

### **A Highly Flexible Micro-Supercapacitor Based on Pen Ink-Carbon-Fiber Thread**

Shuge Dai, Hengyu Guo, Mingjun Wang, Jianlin Liu, Guo Wang, Chenguo Hu<sup>\*</sup>, Yi

Xi<sup>\*</sup>

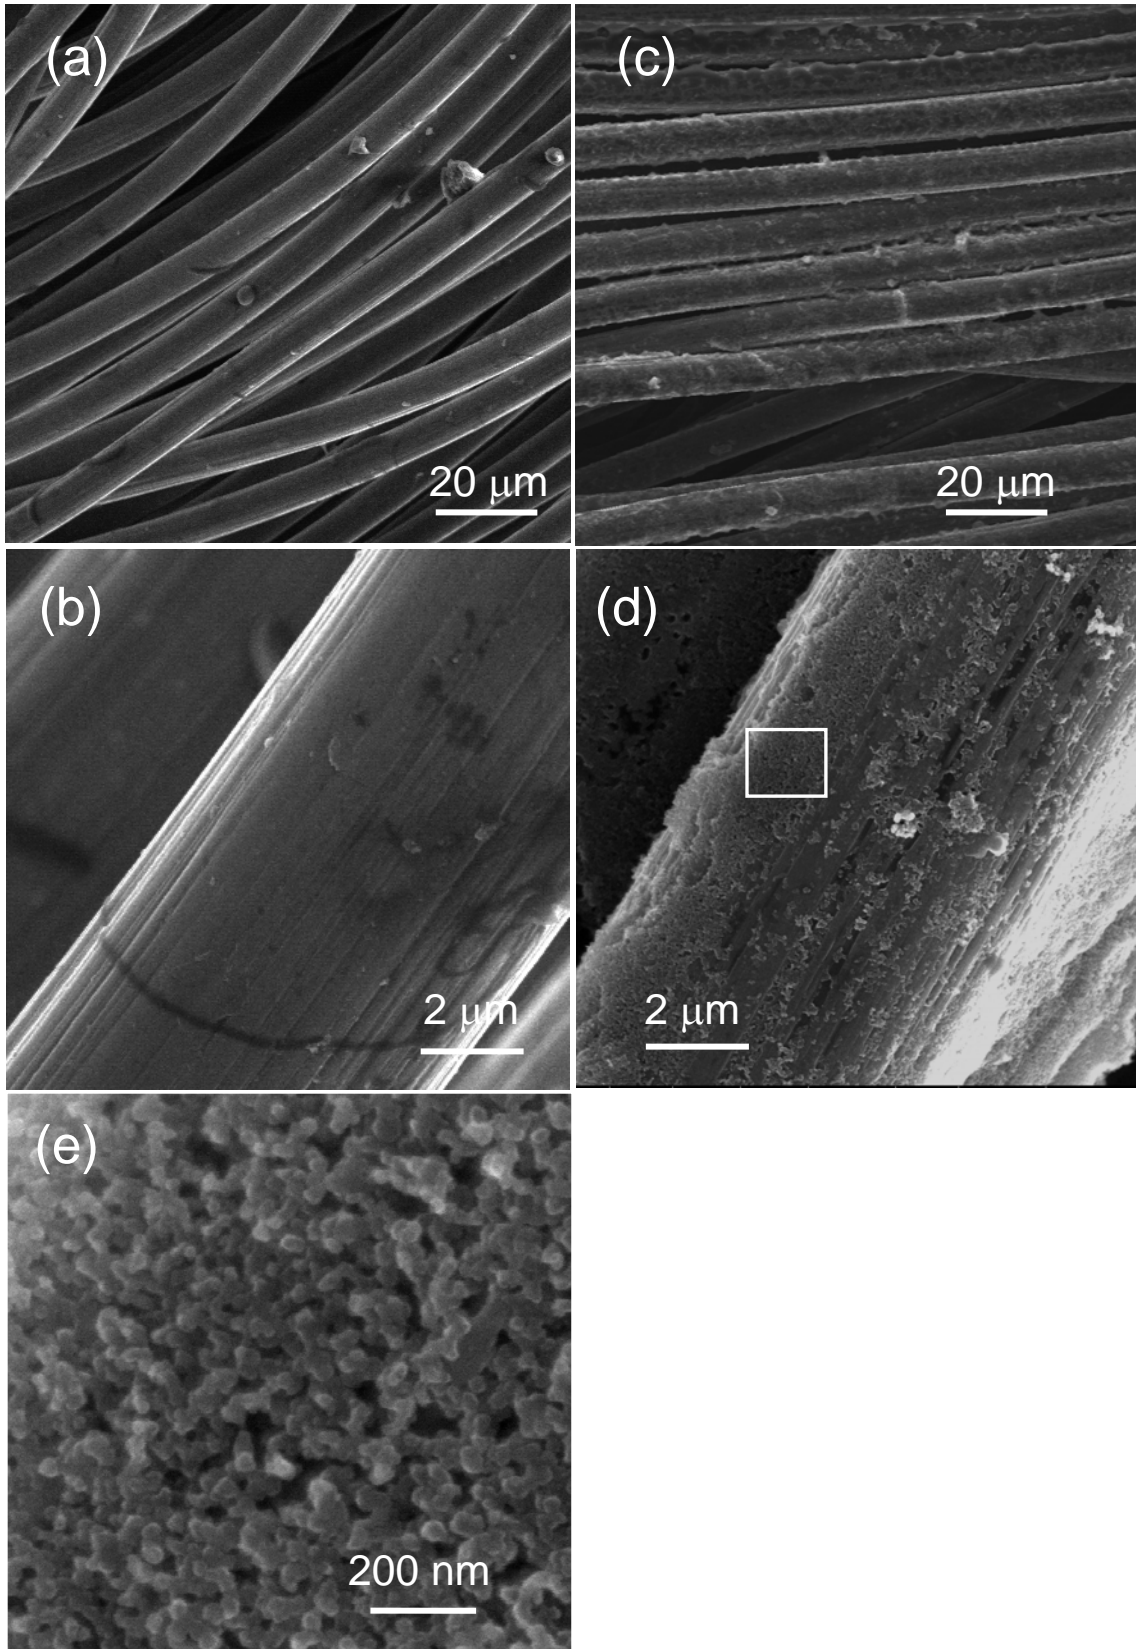

**Fig. S1** SEM image of the pure CF thread (a-b) and the Ink-CF thread (c-d) and enlarged circled part in (d).**■**



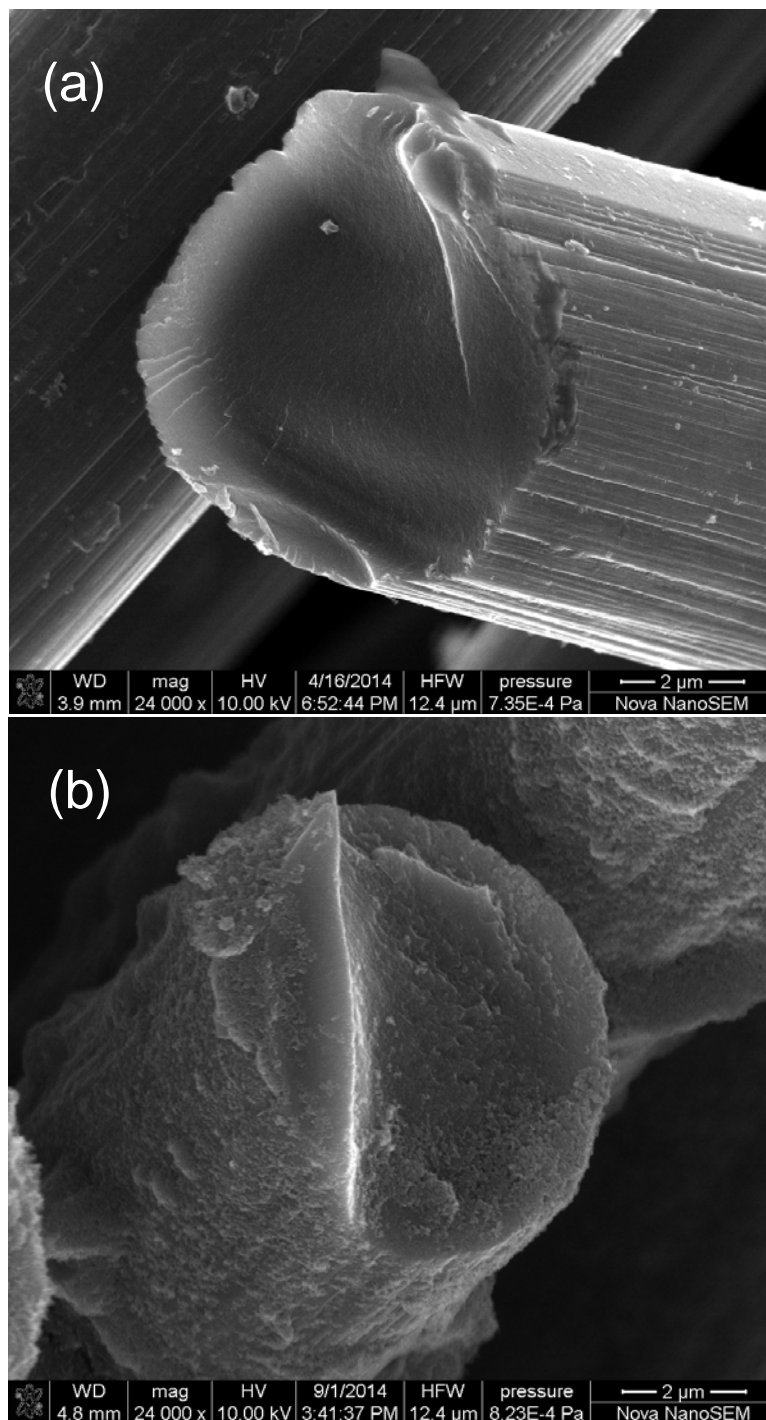

**Fig. S2** Cross-sectional SEM image of the pure CF (a) and the Ink-CF (b).

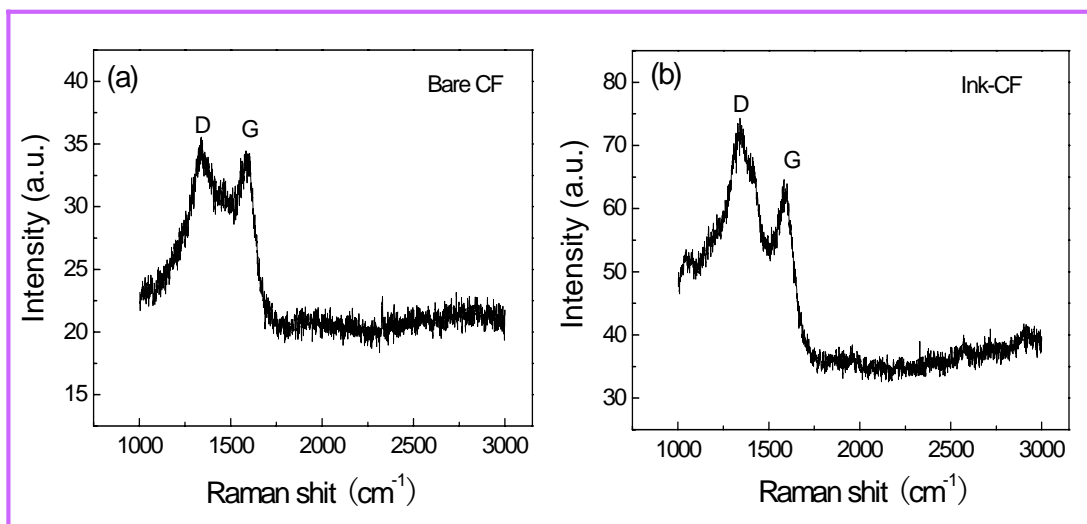

**Fig. S3** Raman spectra of the pure CF (a) and the Ink-CF (b).

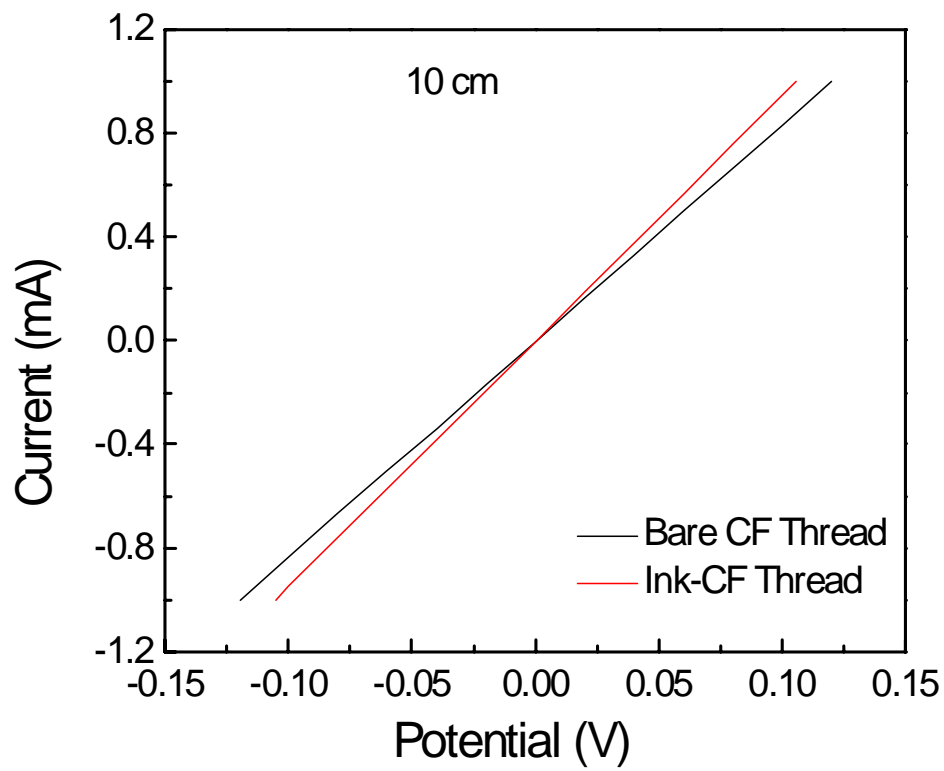

**Fig. S4.** I-V plots of the CF and Ink-CF threads.

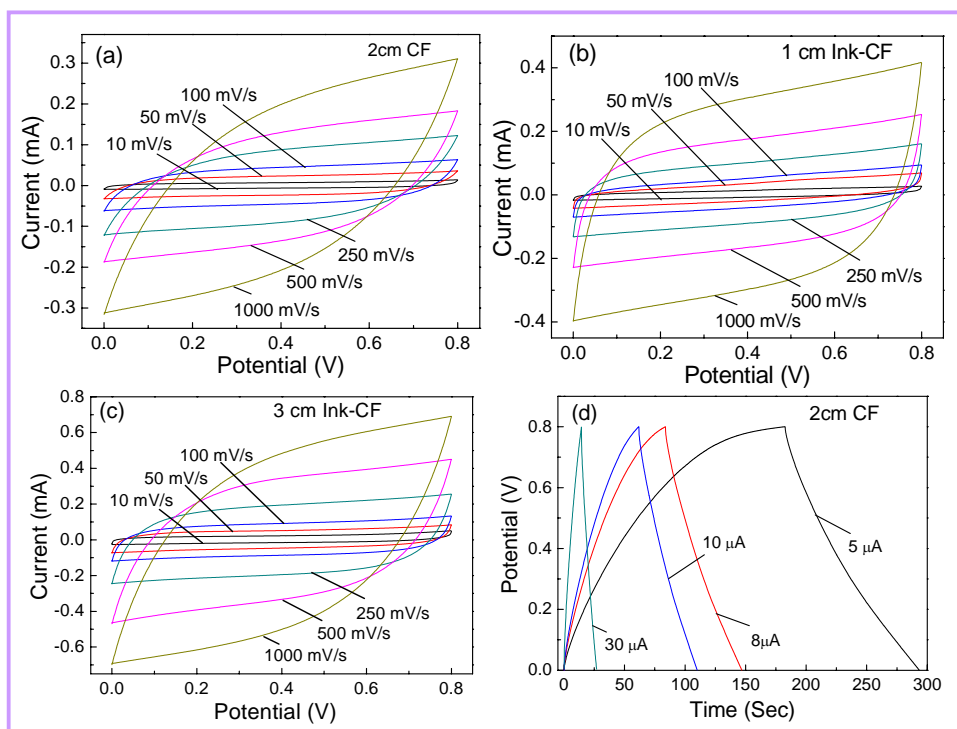

**Fig. S5** (a) CV curves of the bare CF (about 2 cm) thread device at different scan rates. (b), (c) CV curves of the Ink-CF (about 1 cm, 3 cm) thread devices at different scan rates. (d) Galvanostatic charge-discharge curves of the bare CF (about 2 cm) thread devices at various currents.

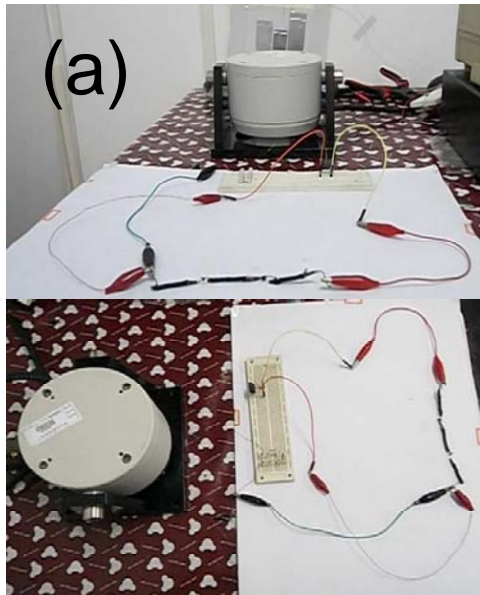

**Fig. S6** Digital photographs of the self-powered nanosystems.

The screen of three micro-supercapacitors connected in series that is being charged by a triboelectric nanogenerator. See Video 1.

The screen of three micro-supercapacitors connected in series that is powering 8 commercial LEDs. See Video 2.
